# Supplementary material
Source: publisher figshare collection journal article supplement (https://geolsoc.figshare.com/ndownloader/files/21445191)
Supplement: Supplementary file 1 [file 21445191]

## Sheet: PC03_data
supplementary data4: AMS data of PC13
Km = mean susceptibility Kmax = maximum susceptibility, Kint = intermediate susceptibility, Kmin = minimum susceptibility. L = Kmax/Kint, F = Kint/Kmin, P′ = exp (√{2[η1 – ηm]2 + (η2 – ηm)2 + (η3 – ηm)2})) whereη1 = ln Kmax,η2 = ln Kint,η3 = ln Kmin, andηm= (η1 + η2 + η3)/3. Kmax Dec: Kmax declination, Kmax Inc: Kmax inclination, Kint Dec: Kint declination Kint Inc: Kint inclination, Kmin Dec: Km…
Kmax, Kint, Kmin directions are re-orientated a mean Paleomagnetic data of PC13 (Inc/dec=38.1/137.2, alf95=0.99, number=215)
SampleID	Total Deph.(cm)	Volume	Km	Kmax	Kint	Kmin	L	F	P'	T	Kmax Dec(°)	Kmax Inc(°)	Kint Dec(°)	Kint Inc(°)	Kmin Dec(°)	Kmin Inc(°)
S2-1	2.28571	7	0.0003465	0.00035097	0.000345599	0.000342931	1.015	1.008	1.024	-0.333	297.1	71	104.1	19	196.1	4
S2-2	4.57143	7	0.0004331	0.000437171	0.000432407	0.000429679	1.011	1.006	1.018	-0.266	90.1	81	278.1	9	188.1	1
S2-3	6.85714	7	0.0004075	0.000408886	0.000408193	0.000405381	1.002	1.007	1.009	0.6	91.1	56	268.1	34	359.1	1
S2-4	9.14286	7	0.0003766	0.000377579	0.000376562	0.000375659	1.003	1.002	1.005	-0.066	17.1	56	110.1	2	201.1	34
S2-5	11.4286	7	0.0004153	0.000417044	0.000415964	0.000412891	1.003	1.007	1.01	0.471	338.1	18	180.1	71	70.1	7
S2-6	13.7143	7	0.0005057	0.000507976	0.000506054	0.00050307	1.004	1.006	1.01	0.21	352.1	71	134.1	16	227.1	11
S2-7	16	7	0.0005416	0.000543441	0.000541817	0.000539596	1.003	1.004	1.007	0.167	98.1	23	347.1	41	209.1	40
S2-8	18.2857	7	0.0005226	0.000526624	0.000522548	0.000518576	1.008	1.008	1.016	-0.013	291.1	4	26.1	51	198.1	39
S2-9	20.5714	7	0.000673	0.000675423	0.000673202	0.000670375	1.003	1.004	1.008	0.126	87.1	20	306.1	65	182.1	14
S2-10	22.8571	7	0.0006	0.00060132	0.00060072	0.00059796	1.001	1.005	1.006	0.669	1.1	17	100.1	26	242.1	59
S2-11	25.1429	7	0.000663	0.000667641	0.000662271	0.000659022	1.008	1.005	1.013	-0.245	33.1	10	301.1	8	174.1	77
S2-12	27.4286	7	0.0007471	0.000750537	0.000748893	0.00074187	1.002	1.009	1.012	0.618	41.1	7	311.1	4	187.1	82
S2-13	29.7143	7	0.0007662	0.000772559	0.00076597	0.000759994	1.009	1.008	1.017	-0.049	74.1	13	343.1	5	231.1	76
S2-14	32	7	0.0007967	0.000803472	0.000800444	0.000786184	1.004	1.018	1.024	0.652	91.1	4	0.1	19	192.1	71
S2-15	34.2857	7	0.000818	0.000824217	0.000819636	0.000810147	1.006	1.012	1.018	0.354	57.1	14	324.1	9	204.1	73
S2-16	36.5714	7	0.0007306	0.00073586	0.000731331	0.000724536	1.006	1.009	1.016	0.206	77.1	16	167.1	2	263.1	73
S2-17	38.8571	7	0.000713	0.000718062	0.000714141	0.000706797	1.006	1.01	1.016	0.304	39.1	15	131.1	6	243.1	74
S2-18	41.1429	7	0.0007064	0.000710638	0.000707601	0.000700961	1.004	1.009	1.014	0.374	79.1	7	349.1	4	232.1	82
S2-19	43.4286	7	0.0007121	0.000716017	0.000711815	0.00070854	1.006	1.005	1.011	-0.125	34.1	21	302.1	6	197.1	68
S2-20	45.7143	7	0.0007008	0.000702622	0.000702132	0.000697646	1.001	1.006	1.008	0.82	87.1	16	350.1	25	206.1	60
S2-21	48	7	0.0007086	0.000711364	0.000707962	0.000706474	1.005	1.002	1.007	-0.397	170.1	23	61.1	38	283.1	43
S2-22	50.2857	7	0.0006992	0.000703116	0.000698081	0.000696403	1.007	1.002	1.01	-0.514	35.1	21	180.1	65	300.1	13
S2-23	52.5714	7	0.0006626	0.00066419	0.00066313	0.00066048	1.002	1.004	1.006	0.448	111.1	51	304.1	38	209.1	7
S2-24	54.8571	7	0.0006962	0.000702327	0.00069613	0.000690143	1.009	1.009	1.018	-0.012	22.1	29	148.1	47	275.1	29
S2-25	57.1428	7	0.0007405	0.000745535	0.000740722	0.000735242	1.006	1.007	1.014	0.069	13.1	14	108.1	18	247.1	67
S2-26	59.4286	7	0.0006715	0.000673917	0.000671701	0.000668881	1.003	1.004	1.008	0.135	54.1	14	148.1	17	287.1	68
S2-27	61.7143	7	0.0006439	0.00064815	0.000645832	0.000637783	1.004	1.013	1.017	0.556	19.1	7	110.1	6	240.1	80
S2-28	64	7	0.0005917	0.000597144	0.000593002	0.000584955	1.007	1.014	1.021	0.328	43.1	7	134.1	4	250.1	82
S2-29	66.2857	7	0.0005174	0.000522212	0.000516934	0.000513054	1.01	1.008	1.018	-0.142	17.1	19	118.1	27	256.1	55
S2-30	68.5714	7	0.0005664	0.000569175	0.000566796	0.000563228	1.004	1.006	1.011	0.202	36.1	13	302.1	16	162.1	69
S2-31	70.8571	7	0.000612	0.000615427	0.000612796	0.000607777	1.004	1.008	1.013	0.315	25.1	18	117.1	8	232.1	70
S2-32	73.1428	7	0.0006306	0.00063451	0.000631609	0.000625681	1.005	1.01	1.014	0.352	55.1	20	147.1	6	252.1	69
S2-33	75.4286	7	0.0006351	0.0006398	0.000634782	0.000630718	1.008	1.006	1.014	-0.1	24.1	5	116.1	23	282.1	66
S2-34	77.7143	7	0.0007485	0.000752242	0.000749024	0.000744234	1.004	1.006	1.011	0.208	47.1	24	310.1	14	192.1	62
S2-35	80	7	0.0008141	0.000819473	0.00081353	0.000809297	1.007	1.005	1.013	-0.156	33.1	14	132.1	33	282.1	53
S2-36	82.2857	7	0.0009513	0.000953869	0.0009513	0.000948731	1.003	1.003	1.005	0.002	21.1	18	286.1	15	158.1	66
S2-37	84.5714	7	0.0007491	0.00075292	0.000749475	0.000744905	1.005	1.006	1.011	0.138	31.1	16	126.1	16	259.1	67
S2-38	86.8571	7	0.0007134	0.00071711	0.000712615	0.000710475	1.006	1.003	1.01	-0.352	43.1	9	310.1	22	155.1	66
S2-39	89.1428	7	0.0006605	0.000665652	0.000660962	0.000654886	1.007	1.009	1.016	0.133	40.1	9	308.1	9	172.1	77
S2-40	91.4286	7	0.0006733	0.00067909	0.000671347	0.000669462	1.012	1.003	1.015	-0.605	34.1	8	295.1	46	132.1	43
S2-41	93.7143	7	0.0006521	0.000656273	0.000651774	0.000648253	1.007	1.005	1.012	-0.114	45.1	4	315.1	3	186.1	85
S2-42	96	7	0.0006386	0.000641282	0.000639239	0.000635279	1.003	1.006	1.01	0.33	243.1	9	333.1	2	73.1	81
S3-1	99.7727	7	0.0006211	0.000623088	0.000620417	0.000619858	1.004	1.001	1.006	-0.638	347.1	2	253.1	67	78.1	23
S3-2	102.045	7	0.0006316	0.000634	0.000632295	0.000628568	1.003	1.006	1.009	0.382	113.1	22	222.1	40	1.1	42
S3-3	104.318	7	0.0006037	0.000609556	0.000603941	0.000597542	1.009	1.011	1.02	0.071	20.1	2	290.1	7	122.1	82
S3-4	106.591	7	0.0005664	0.000571668	0.000568779	0.000558754	1.005	1.018	1.024	0.553	347.1	12	77.1	2	178.1	78
S3-5	108.864	7	0.0005233	0.000528376	0.000523457	0.000518067	1.009	1.01	1.02	0.055	58.1	4	148.1	3	276.1	85
S3-6	111.136	7	0.0005386	0.00054334	0.000541239	0.000531221	1.004	1.019	1.024	0.652	358.1	6	88.1	3	204.1	83
S3-7	113.409	7	0.0005152	0.000524371	0.000520043	0.000501187	1.008	1.038	1.049	0.632	38.1	1	128.1	11	303.1	79
S3-8	115.682	7	0.0005296	0.000546759	0.000527588	0.000514453	1.036	1.026	1.063	-0.172	219.1	16	97.1	62	316.1	23
S3-9	117.955	7	0.0005283	0.000543726	0.000528723	0.000512398	1.028	1.032	1.061	0.057	219.1	21	102.1	50	323.1	32
S3-10	120.227	7	0.000523	0.000532989	0.000521274	0.000514789	1.022	1.013	1.036	-0.28	222.1	8	122.1	49	319.1	39
S3-11	122.5	7	0.0005412	0.000552295	0.00054028	0.000531025	1.022	1.017	1.04	-0.121	237.1	19	77.1	70	329.1	6
S3-12	124.773	7	0.0005394	0.000551429	0.000536865	0.000529907	1.027	1.013	1.041	-0.347	232.1	9	134.1	42	332.1	47
S3-13	127.045	7	0.0005072	0.000517293	0.000504461	0.000499846	1.025	1.009	1.036	-0.461	241.1	14	10.1	68	147.1	16
S3-14	129.318	7	0.0005184	0.000526124	0.000516326	0.000512749	1.019	1.007	1.027	-0.458	236.1	17	22.1	70	143.1	11
S3-15	131.591	7	0.0005537	0.000571363	0.000554309	0.000535428	1.031	1.035	1.067	0.067	231.1	33	15.1	52	129.1	18
S3-16	133.864	7	0.0005557	0.000569204	0.000556534	0.000541363	1.023	1.028	1.052	0.104	220.1	39	13.1	48	119.1	14
S3-17	136.136	7	0.0005736	0.000585531	0.000580541	0.000554729	1.009	1.047	1.06	0.683	243.1	69	21.1	16	114.1	13
S3-18	138.409	7	0.0005696	0.000578258	0.000573359	0.00055724	1.009	1.029	1.04	0.539	332.1	55	216.1	17	117.1	30
S3-19	140.682	7	0.0005698	0.000573561	0.000571224	0.000564672	1.004	1.012	1.016	0.479	34.1	3	303.1	30	129.1	60
S3-20	142.955	7	0.0005674	0.000570918	0.000566889	0.00056445	1.007	1.004	1.012	-0.247	15.1	11	110.1	24	263.1	64
S3-21	145.227	7	0.0004914	0.000493464	0.00049199	0.000488796	1.003	1.007	1.01	0.367	71.1	2	161.1	1	281.1	87
S3-22	147.5	7	0.0004684	0.000471726	0.000470274	0.000463248	1.003	1.015	1.02	0.66	57.1	25	325.1	5	225.1	65
S3-23	149.773	7	0.0004913	0.000494788	0.000490907	0.000488254	1.008	1.005	1.013	-0.181	37.1	4	128.1	17	295.1	72
S3-24	152.045	7	0.0005433	0.000547809	0.000544658	0.000537378	1.006	1.014	1.02	0.4	19.1	7	112.1	19	270.1	69
S3-25	154.318	7	0.0005974	0.000602179	0.00059507	0.000594951	1.012	1	1.014	-0.963	74.1	23	202.1	55	333.1	25
S3-26	156.591	7	0.0005659	0.000568503	0.000565957	0.000563184	1.005	1.005	1.009	0.044	40.1	10	130.1	3	238.1	79
S3-27	158.864	7	0.0005913	0.000594316	0.000592364	0.000587279	1.003	1.009	1.012	0.445	14.1	18	105.1	3	205.1	72
S3-28	161.136	7	0.0005465	0.000548905	0.000546063	0.000544533	1.005	1.003	1.008	-0.283	27.1	13	292.1	18	152.1	67
S3-29	163.409	7	0.0005254	0.000526503	0.000525768	0.000523929	1.001	1.003	1.005	0.415	46.1	7	314.1	14	162.1	75
S3-30	165.682	7	0.000526	0.000527841	0.000526894	0.000523265	1.002	1.007	1.009	0.589	95.1	13	0.1	19	218.1	67
S3-31	167.955	7	0.0004978	0.000499741	0.000499044	0.000494614	1.001	1.009	1.011	0.735	13.1	14	108.1	20	251.1	66
S3-32	170.227	7	0.0004649	0.000468108	0.000465783	0.000460855	1.005	1.011	1.016	0.365	114.1	15	20.1	14	247.1	69
S3-33	172.5	7	0.0004315	0.000436851	0.00043314	0.00042451	1.009	1.02	1.03	0.403	62.1	13	152.1	0	244.1	77
S3-34	174.773	7	0.0003767	0.000380618	0.00037719	0.000372293	1.009	1.013	1.022	0.18	31.1	17	299.1	5	195.1	72
S3-35	177.045	7	0.0004262	0.00042799	0.000427138	0.000423472	1.002	1.009	1.011	0.632	292.1	5	22.1	9	173.1	80
S3-36	179.318	7	0.0006143	0.000615529	0.000614054	0.000613317	1.002	1.001	1.004	-0.328	298.1	14	35.1	26	183.1	60
S3-37	181.591	7	0.0006509	0.000652983	0.00065064	0.000649077	1.004	1.002	1.006	-0.208	30.1	28	292.1	16	175.1	57
S3-38	183.864	7	0.000636	0.000639434	0.00063689	0.000631675	1.004	1.008	1.012	0.355	38.1	24	250.1	62	134.1	13
S3-39	186.136	7	0.000614	0.00061664	0.000613018	0.000612342	1.006	1.001	1.008	-0.697	42.1	6	308.1	34	140.1	55
S3-40	188.409	7	0.00053	0.000532809	0.000531219	0.000525972	1.003	1.01	1.014	0.541	200.1	1	291.1	17	109.1	73
S3-41	190.682	7	0.0004983	0.000502137	0.000499645	0.000493118	1.005	1.013	1.019	0.448	51.1	18	143.1	6	250.1	71
S3-42	192.955	7	0.0004472	0.000451851	0.000447066	0.000442683	1.011	1.01	1.021	-0.037	215.1	1	124.1	12	312.1	78
S3-43	195.227	7	0.0004435	0.000447314	0.00044421	0.000438976	1.007	1.012	1.019	0.262	27.1	11	296.1	5	180.1	77
S3-44	197.5	7	0.0004198	0.000421059	0.000419968	0.000418373	1.003	1.004	1.006	0.169	64.1	42	324.1	11	223.1	46
S4-1	199.791	7	0.0004341	0.000435402	0.000434491	0.000432364	1.002	1.005	1.007	0.393	47.1	59	217.1	30	310.1	4
S4-2	202.081	7	0.0004569	0.000458362	0.000457266	0.000455072	1.002	1.005	1.007	0.322	33.1	11	184.1	77	302.1	6
S4-3	204.372	7	0.0005069	0.000511817	0.000507914	0.00050102	1.008	1.014	1.022	0.28	13.1	2	104.1	9	269.1	80
S4-4	206.663	7	0.0005262	0.000530515	0.000526831	0.000521254	1.007	1.011	1.018	0.207	16.1	4	106.1	5	242.1	84
S4-5	208.953	7	0.0005062	0.000508782	0.000507314	0.000502505	1.003	1.01	1.013	0.531	342.1	14	73.1	4	179.1	76
S4-6	211.244	7	0.0005457	0.000549738	0.000545482	0.000541826	1.008	1.007	1.015	-0.073	50.1	1	320.1	27	143.1	63
S4-7	213.535	7	0.0005685	0.000571456	0.000569353	0.000564691	1.004	1.008	1.012	0.375	40.1	14	134.1	17	272.1	68
S4-8	215.826	7	0.0006397	0.000642323	0.000639252	0.000637589	1.005	1.003	1.008	-0.301	353.1	25	84.1	1	175.1	65
S4-9	218.116	7	0.0006362	0.000640653	0.000636582	0.000631365	1.006	1.008	1.015	0.117	17.1	4	286.1	18	119.1	71
S4-10	220.407	7	0.0006631	0.000668007	0.00066257	0.000658724	1.008	1.006	1.014	-0.162	47.1	17	316.1	4	212.1	72
S4-11	222.698	7	0.0006344	0.000640998	0.000633131	0.000629071	1.012	1.006	1.019	-0.317	74.1	9	165.1	6	286.1	79
S4-12	224.988	7	0.0006247	0.000630572	0.000625824	0.000617703	1.008	1.013	1.021	0.268	37.1	10	306.1	8	179.1	77
S4-13	227.279	7	0.0005767	0.000580968	0.000578084	0.000571048	1.005	1.012	1.018	0.417	175.1	4	84.1	7	296.1	82
S4-14	229.57	7	0.0005892	0.000596506	0.000593148	0.000577946	1.006	1.026	1.034	0.642	159.1	5	68.1	16	267.1	73
S4-15	231.86	7	0.000634	0.000639769	0.00063717	0.000625061	1.004	1.019	1.025	0.654	14.1	11	107.1	13	247.1	73
S4-16	234.151	7	0.0006065	0.000614809	0.000604438	0.000600192	1.017	1.007	1.025	-0.412	18.1	11	111.1	12	247.1	74
S4-17	236.442	7	0.0005714	0.000577285	0.000573057	0.000563858	1.007	1.016	1.024	0.38	14.1	9	284.1	0	192.1	81
S4-18	238.733	7	0.0005291	0.000535555	0.000529629	0.000522116	1.011	1.014	1.026	0.128	42.1	7	309.1	24	148.1	65
S4-19	241.023	7	0.0005501	0.000556591	0.000553511	0.000540198	1.005	1.025	1.032	0.633	2.1	10	93.1	6	214.1	78
S4-20	243.314	7	0.0006061	0.00061404	0.000608888	0.000595372	1.008	1.023	1.032	0.456	40.1	14	308.1	8	189.1	74
S4-21	245.605	7	0.0006072	0.00061394	0.000609629	0.000598092	1.007	1.019	1.027	0.461	11.1	16	280.1	3	179.1	74
S4-22	247.895	7	0.000601	0.000605688	0.000600399	0.000596913	1.009	1.006	1.015	-0.195	20.1	18	116.1	17	247.1	65
S4-23	250.186	7	0.0005641	0.000569628	0.000562182	0.00056049	1.013	1.003	1.017	-0.63	37.1	10	277.1	70	130.1	17
S4-24	252.477	7	0.0005563	0.000567982	0.000556467	0.000544451	1.021	1.022	1.043	0.03	240.1	7	334.1	33	140.1	56
S4-25	254.767	7	0.0005853	0.000590041	0.000583661	0.000582256	1.011	1.002	1.014	-0.639	36.1	2	302.1	64	126.1	26
S4-26	257.058	7	0.0006073	0.00061228	0.000608089	0.000601531	1.007	1.011	1.018	0.229	28.1	5	295.1	26	129.1	63
S4-27	259.349	7	0.0005626	0.00056907	0.000564682	0.000554048	1.008	1.019	1.028	0.418	46.1	8	314.1	11	172.1	76
S4-28	261.64	7	0.0005487	0.000552925	0.000549468	0.000543707	1.006	1.011	1.017	0.251	33.1	10	302.1	4	193.1	80
S4-29	263.93	7	0.0005721	0.000577421	0.000573073	0.000565807	1.008	1.013	1.021	0.251	38.1	9	130.1	12	273.1	75
S4-30	266.221	7	0.0005881	0.000595216	0.0005861	0.000582984	1.016	1.005	1.022	-0.491	45.1	8	136.1	9	276.1	78
S4-31	268.512	7	0.0006399	0.000645787	0.000639452	0.000634397	1.01	1.008	1.018	-0.107	29.1	8	297.1	16	145.1	72
S4-32	270.802	7	0.0006344	0.000639475	0.000633575	0.00063015	1.009	1.005	1.015	-0.263	46.1	2	136.1	9	302.1	81
S4-33	273.093	7	0.0005778	0.000583174	0.000577338	0.000572889	1.01	1.008	1.018	-0.123	56.1	3	326.1	9	163.1	81
S4-34	275.384	7	0.0005729	0.000577712	0.000572614	0.000568374	1.009	1.007	1.016	-0.086	39.1	9	309.1	1	215.1	81
S4-35	277.674	7	0.0005542	0.000557802	0.00055614	0.000548658	1.003	1.014	1.018	0.646	31.1	9	301.1	1	205.1	80
S4-36	279.965	7	0.0006061	0.000610343	0.00060513	0.000602827	1.009	1.004	1.013	-0.392	35.1	2	305.1	3	160.1	86
S4-37	282.256	7	0.0006714	0.000678785	0.000672743	0.000662739	1.009	1.015	1.024	0.252	76.1	2	346.1	18	171.1	72
S4-38	284.546	7	0.0006427	0.000646171	0.000644178	0.000637687	1.003	1.01	1.014	0.532	59.1	6	327.1	12	177.1	77
S4-39	286.837	7	0.0006364	0.000640027	0.000637673	0.000631563	1.004	1.01	1.014	0.451	38.1	17	305.1	9	189.1	71
S4-40	289.128	7	0.0006106	0.000618232	0.000609501	0.000604067	1.014	1.009	1.024	-0.232	33.1	1	123.1	7	292.1	82
S4-41	291.419	7	0.000586	0.000591157	0.000586586	0.000580257	1.008	1.011	1.019	0.165	194.1	7	104.1	0	12.1	83
S4-42	293.709	7	0.0005913	0.000594966	0.000593429	0.000585505	1.003	1.014	1.017	0.677	200.1	1	290.1	13	105.1	77
S4-43	296	7	0.0006119	0.000617958	0.000610982	0.00060676	1.011	1.007	1.019	-0.238	3.1	4	97.1	42	269.1	47
S5-1	299.761	7	0.0006351	0.000637704	0.000634592	0.000633004	1.005	1.003	1.008	-0.303	39.1	2	129.1	16	301.1	74
S5-2	302.023	7	0.0006291	0.000633504	0.000628282	0.000625514	1.008	1.004	1.013	-0.31	40.1	0	130.1	5	307.1	85
S5-3	304.284	7	0.0006198	0.000623271	0.000621102	0.000615028	1.003	1.01	1.014	0.485	52.1	19	143.1	2	238.1	71
S5-4	306.545	7	0.0005947	0.000598982	0.000595176	0.000589942	1.006	1.009	1.015	0.159	45.1	11	139.1	18	285.1	69
S5-5	308.807	7	0.0006262	0.000630834	0.000626075	0.000621691	1.008	1.007	1.015	-0.031	32.1	8	122.1	4	241.1	81
S5-6	311.068	7	0.0006173	0.000623288	0.000615139	0.000613411	1.013	1.003	1.017	-0.647	29.1	4	295.1	49	122.1	41
S5-7	313.33	7	0.0005767	0.00058091	0.000578603	0.000570587	1.004	1.014	1.019	0.552	24.1	7	294.1	4	175.1	82
S5-8	315.591	7	0.0005157	0.000518639	0.000517969	0.000510491	1.001	1.015	1.018	0.838	206.1	2	116.1	3	326.1	86
S5-9	317.852	7	0.0004938	0.000496565	0.000494047	0.000490788	1.005	1.007	1.012	0.134	41.1	1	131.1	5	297.1	85
S5-10	320.114	7	0.0005144	0.000517229	0.000516149	0.000509873	1.002	1.012	1.016	0.709	130.1	3	40.1	5	247.1	84
S5-11	322.375	7	0.0005035	0.000507679	0.000507125	0.000495746	1.001	1.023	1.027	0.911	209.1	2	119.1	4	325.1	86
S5-12	324.636	7	0.0004957	0.000502789	0.000497435	0.000486926	1.011	1.022	1.033	0.331	173.1	3	83.1	4	303.1	85
S5-13	326.898	7	0.0005197	0.000529938	0.000522766	0.000506396	1.014	1.032	1.048	0.402	14.1	1	104.1	1	253.1	89
S5-14	329.159	7	0.0005307	0.000537493	0.000535954	0.0005186	1.003	1.033	1.041	0.841	20.1	5	290.1	0	197.1	85
S5-15	331.42	7	0.0005713	0.000584097	0.000579927	0.000549876	1.007	1.055	1.068	0.763	243.1	1	153.1	23	336.1	67
S5-16	333.682	7	0.0005555	0.000565888	0.000560055	0.000540557	1.01	1.036	1.049	0.55	164.1	10	73.1	5	316.1	79
S5-17	335.943	7	0.0006334	0.000645181	0.000642141	0.000612878	1.005	1.048	1.058	0.814	36.1	0	306.1	1	143.1	89
S5-18	338.205	7	0.0006502	0.000657937	0.000651695	0.000640967	1.01	1.017	1.027	0.265	258.1	4	168.1	1	62.1	86
S5-19	340.466	7	0.0006543	0.000661301	0.000657375	0.000644224	1.006	1.02	1.028	0.541	41.1	7	311.1	1	211.1	83
S5-20	342.727	7	0.0006237	0.000630186	0.000626631	0.000614282	1.006	1.02	1.027	0.552	31.1	11	122.1	2	220.1	78
S5-21	344.989	7	0.000588	0.00059435	0.000589705	0.000579886	1.008	1.017	1.025	0.363	37.1	7	307.1	0	217.1	83
S5-22	347.25	7	0.0005443	0.000549689	0.000543592	0.000539619	1.011	1.007	1.019	-0.199	17.1	9	108.1	10	247.1	76
S5-23	349.511	7	0.0005313	0.000538366	0.000532416	0.000523118	1.011	1.018	1.029	0.225	21.1	6	291.1	4	169.1	83
S5-24	351.773	7	0.0005273	0.000534629	0.000524769	0.000522502	1.019	1.004	1.025	-0.628	17.1	6	286.1	14	130.1	74
S5-25	354.034	7	0.0005372	0.000544882	0.000537737	0.000528981	1.013	1.017	1.03	0.109	33.1	13	130.1	24	277.1	62
S5-26	356.295	7	0.0005365	0.00054267	0.000535427	0.00053135	1.014	1.008	1.022	-0.274	263.1	2	170.1	47	355.1	43
S5-27	358.557	7	0.000539	0.000545252	0.000538515	0.000533233	1.012	1.01	1.023	-0.117	71.1	0	161.1	4	337.1	86
S5-28	360.818	7	0.0005571	0.000560833	0.000560554	0.000549913	1	1.019	1.023	0.952	93.1	6	184.1	8	325.1	80
S5-29	363.08	7	0.0005445	0.000548257	0.00054597	0.000539273	1.004	1.012	1.017	0.488	105.1	10	198.1	19	347.1	68
S5-30	365.341	7	0.000519	0.000522166	0.000521024	0.000513862	1.002	1.014	1.017	0.725	165.1	1	73.1	68	256.1	22
S5-31	367.602	7	0.0005394	0.000543715	0.000537782	0.000536757	1.011	1.002	1.014	-0.699	177.1	12	289.1	62	82.1	26
S5-32	369.864	7	0.0005277	0.000531077	0.000528069	0.000524006	1.006	1.008	1.014	0.153	8.1	0	278.1	45	98.1	45
S5-33	372.125	7	0.0005485	0.000552285	0.000548555	0.000544661	1.007	1.007	1.014	0.016	12.1	6	282.1	5	151.1	82
S5-34	374.386	7	0.0005451	0.000549461	0.000546354	0.000539485	1.006	1.013	1.019	0.385	18.1	5	109.1	3	224.1	84
S5-35	376.648	7	0.0005213	0.00052448	0.000521821	0.000517547	1.005	1.008	1.014	0.233	145.1	10	239.1	23	34.1	65
S5-36	378.909	7	0.0004983	0.000501389	0.000500443	0.000493018	1.002	1.015	1.019	0.775	41.1	22	309.1	5	208.1	67
S5-37	381.17	7	0.0008403	0.000854081	0.00085072	0.000816099	1.004	1.042	1.052	0.827	314.1	0	224.1	1	61.1	89
S5-38	383.432	7	0.0007053	0.00072124	0.000717854	0.000676806	1.005	1.061	1.074	0.852	243.1	2	153.1	3	4.1	87
S5-39	385.693	7	0.0008092	0.000829996	0.000820124	0.000777479	1.012	1.055	1.072	0.633	25.1	12	116.1	3	220.1	78
S5-40	387.955	7	0.0004785	0.000489027	0.00048606	0.000460461	1.006	1.056	1.068	0.797	42.1	2	132.1	7	297.1	83
S5-41	390.216	7	0.0004865	0.000492922	0.00049156	0.000475019	1.003	1.035	1.042	0.851	52.1	1	142.1	2	294.1	87
S5-42	392.477	7	0.0004349	0.0004359	0.000434857	0.000433943	1.002	1.002	1.005	-0.062	171.1	11	354.1	79	261.1	0
S5-43	394.739	7	0.0004435	0.000447891	0.000444697	0.000437912	1.007	1.015	1.023	0.364	59.1	14	327.1	8	211.1	74
S5-44	397	7	0.0006493	0.00065891	0.000648456	0.000640534	1.016	1.012	1.029	-0.13	144.1	43	4.1	40	255.1	21
S6-1	399.286	7	0.0004552	0.000457476	0.000455246	0.000452878	1.005	1.005	1.01	0.043	358.1	5	89.1	11	245.1	78
S6-2	401.571	7	0.0005015	0.000504459	0.000502152	0.000497889	1.005	1.009	1.013	0.296	41.1	14	135.1	17	274.1	67
S6-3	403.857	7	0.0004908	0.000493745	0.000490309	0.000488346	1.007	1.004	1.011	-0.281	6.1	0	276.1	10	99.1	80
S6-4	406.143	7	0.0005133	0.000522334	0.00051756	0.000500006	1.009	1.035	1.047	0.579	31.1	1	121.1	3	277.1	87
S6-5	408.429	7	0.0005556	0.000560712	0.000559711	0.000546377	1.002	1.024	1.029	0.865	151.1	8	241.1	1	335.1	82
S6-6	410.714	7	0.0005107	0.000514071	0.000510496	0.000507534	1.007	1.006	1.013	-0.09	23.1	28	254.1	50	128.1	26
S6-7	413	7	0.0005115	0.000517075	0.000513699	0.000503725	1.007	1.02	1.028	0.493	17.1	4	107.1	3	231.1	85
S6-8	415.286	7	0.0005916	0.00059651	0.000593907	0.000584382	1.004	1.016	1.022	0.571	104.1	8	194.1	0	286.1	82
S6-9	417.571	7	0.0006363	0.000642854	0.000633309	0.0006328	1.015	1.001	1.018	-0.901	120.1	19	276.1	69	27.1	8
S6-10	419.857	7	0.0006876	0.000700046	0.0006854	0.000677355	1.021	1.012	1.034	-0.283	100.1	17	303.1	71	192.1	7
S6-11	422.143	7	0.0006937	0.000708129	0.000691827	0.000681144	1.024	1.016	1.04	-0.199	97.1	22	254.1	66	4.1	8
S6-12	424.429	7	0.0007629	0.00077503	0.000765341	0.000748329	1.013	1.023	1.036	0.283	88.1	35	221.1	44	339.1	25
S6-13	426.714	7	0.00074	0.000747474	0.000744144	0.000728382	1.004	1.022	1.028	0.655	59.1	19	187.1	61	321.1	21
S6-14	429	7	0.0007617	0.000767641	0.000761319	0.00075614	1.008	1.007	1.015	-0.097	57.1	17	163.1	44	311.1	42
S6-15	431.286	7	0.0006204	0.000625611	0.000620214	0.000615375	1.009	1.008	1.017	-0.046	37.1	3	128.1	22	300.1	68
S6-16	433.571	7	0.000493	0.000496402	0.000493838	0.00048876	1.005	1.01	1.016	0.338	38.1	10	133.1	22	284.1	66
S6-17	435.857	7	0.0006314	0.000634936	0.000631779	0.000627422	1.005	1.007	1.012	0.161	213.1	7	309.1	41	115.1	49
S6-18	438.143	7	0.0005679	0.000572046	0.000568809	0.000562846	1.006	1.011	1.017	0.299	24.1	11	115.1	4	222.1	78
S6-19	440.429	7	0.0005822	0.000585111	0.000581618	0.000579871	1.006	1.003	1.009	-0.324	201.1	6	291.1	1	31.1	84
S6-20	442.714	7	0.000566	0.000568943	0.000567755	0.000561246	1.002	1.012	1.015	0.694	70.1	5	340.1	2	228.1	85
S6-21	445	7	0.0005315	0.000536762	0.000532563	0.000525175	1.008	1.014	1.022	0.283	35.1	2	125.1	4	275.1	85
S6-22	447.286	7	0.0005342	0.000538046	0.000535856	0.000528698	1.004	1.013	1.018	0.533	81.1	8	349.1	12	204.1	76
S6-23	449.571	7	0.0005367	0.000539867	0.000536432	0.000533802	1.006	1.005	1.011	-0.126	51.1	12	317.1	21	169.1	66
S6-24	451.857	7	0.0005401	0.000542963	0.00054172	0.000535617	1.002	1.011	1.015	0.662	14.1	9	105.1	4	220.1	80
S6-25	454.143	7	0.0005383	0.00054083	0.000538246	0.000535878	1.005	1.004	1.009	-0.04	7.1	4	97.1	0	194.1	86
S6-26	456.429	7	0.0005907	0.000592767	0.000591822	0.00058751	1.002	1.007	1.01	0.633	38.1	3	307.1	17	138.1	72
S6-27	458.714	7	0.0005754	0.000577817	0.000575745	0.000572638	1.004	1.005	1.009	0.209	47.1	21	138.1	2	232.1	69
S6-28	461	7	0.0006844	0.000687206	0.000686385	0.000679609	1.001	1.01	1.012	0.792	52.1	13	320.1	8	199.1	75
S6-29	463.286	7	0.0005618	0.000565845	0.000561631	0.000557924	1.007	1.007	1.014	-0.061	55.1	9	146.1	3	252.1	80
S6-30	465.571	7	0.0005606	0.000563515	0.000561217	0.000557068	1.004	1.007	1.012	0.279	28.1	8	118.1	1	218.1	82
S6-31	467.857	7	0.0006011	0.000605127	0.000602483	0.00059569	1.004	1.011	1.016	0.445	30.1	7	300.1	6	166.1	81
S6-32	470.143	7	0.000622	0.000624612	0.000621813	0.000619574	1.004	1.004	1.008	-0.098	8.1	2	278.1	14	106.1	76
S6-33	472.429	7	0.0007173	0.000720169	0.00071773	0.000714	1.003	1.005	1.009	0.209	28.1	11	297.1	9	166.1	76
S6-34	474.714	7	0.0006832	0.000686548	0.000683678	0.000679374	1.004	1.006	1.011	0.209	241.1	7	334.1	21	134.1	68
S6-35	477	7	0.000724	0.000729285	0.000724869	0.000717846	1.006	1.01	1.016	0.241	35.1	3	125.1	6	277.1	84
S6-36	479.286	7	0.0006785	0.000683589	0.000680468	0.000671444	1.005	1.014	1.019	0.496	345.1	10	80.1	29	238.1	59
S6-37	481.571	7	0.0007327	0.000738122	0.000733433	0.000726619	1.006	1.009	1.016	0.187	337.1	5	247.1	9	95.1	80
S6-38	483.857	7	0.0007613	0.000766172	0.00076366	0.000754068	1.003	1.013	1.017	0.593	20.1	2	110.1	10	277.1	79
S6-39	486.143	7	0.0008419	0.000848635	0.000843247	0.000833902	1.006	1.011	1.018	0.27	28.1	7	296.1	14	145.1	74
S6-40	488.429	7	0.0007977	0.000807193	0.000802008	0.0007839	1.006	1.023	1.031	0.563	87.1	7	178.1	5	304.1	81
S6-41	490.714	7	0.0007536	0.000757142	0.000754429	0.000749229	1.004	1.007	1.011	0.312	103.1	10	9.1	25	214.1	63
S6-42	493	7	0.0006834	0.000692626	0.000684903	0.000672671	1.011	1.018	1.03	0.235	17.1	7	107.1	2	211.1	83
